# Supplementary material
Source: ML conference proceedings conference paper supplement (https://openaccess.thecvf.com/content/CVPR2025/html/Xie_MaSS13K_A_Matting-level_CVPR_2025_paper.html)
Supplement: Supplementary file 1 [file Xie_MaSS13K_A_Matting-level_CVPR_2025_supplemental.pdf]

# Supplementary Materials to “MaSS13K: A Matting-level Semantic Segmentation Benchmark”

In this supplementary file, we provide the following materials:

- More samples from our MaSS13K dataset (referring to Sec. 3 of the main paper).
- More details on training and evaluation metrics (referring to Sec. 5 of the main paper).
- More experimental results (referring to Sec. 5.1, 5.2, 5.3 of the main paper).
- Limitations.

## A. MaSS13K Dataset

### A.1. More Samples from MaSS13K

We provide more annotated samples from our MaSS13K in Fig. 1. MaSS13K covers a diverse range of indoor and outdoor scenes, such as urban areas, natural landscapes, street views, wilderness, parks, mall interiors, and other public spaces.

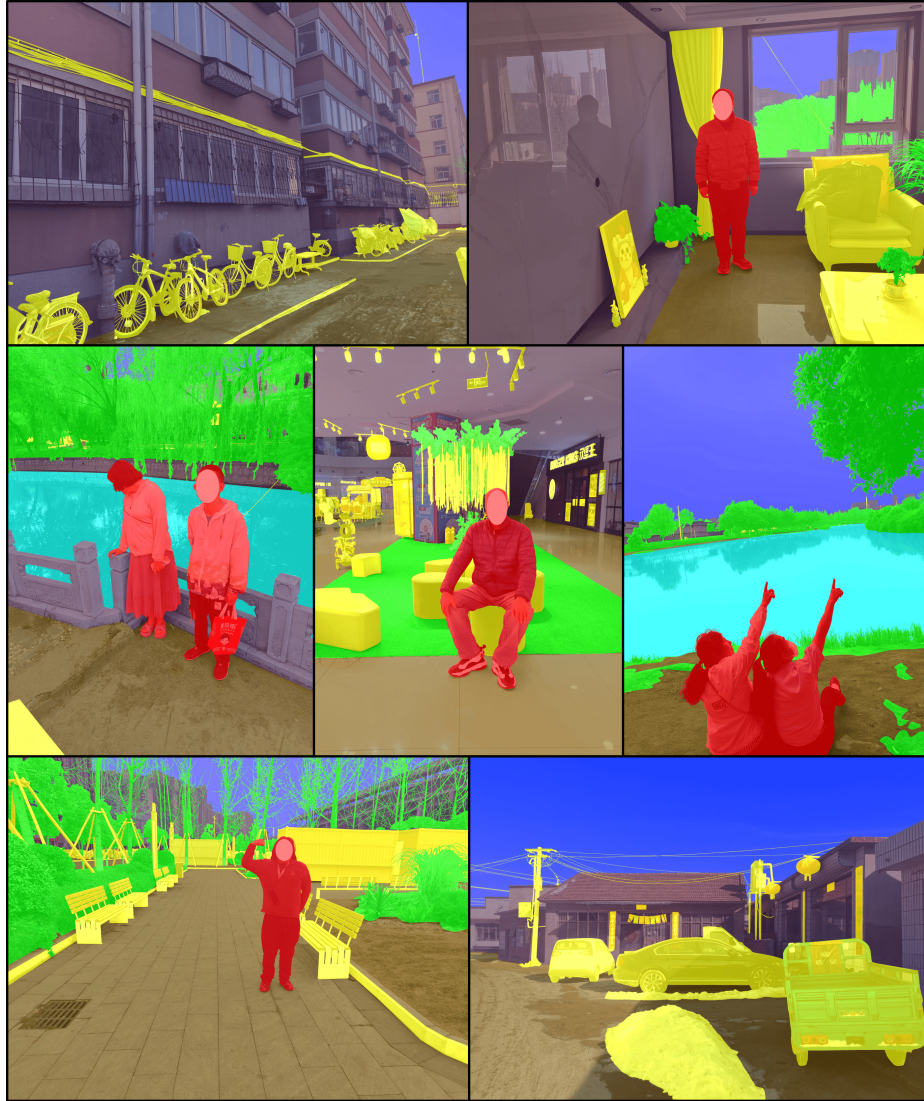

Figure 1. More samples from our MaSS13K dataset.

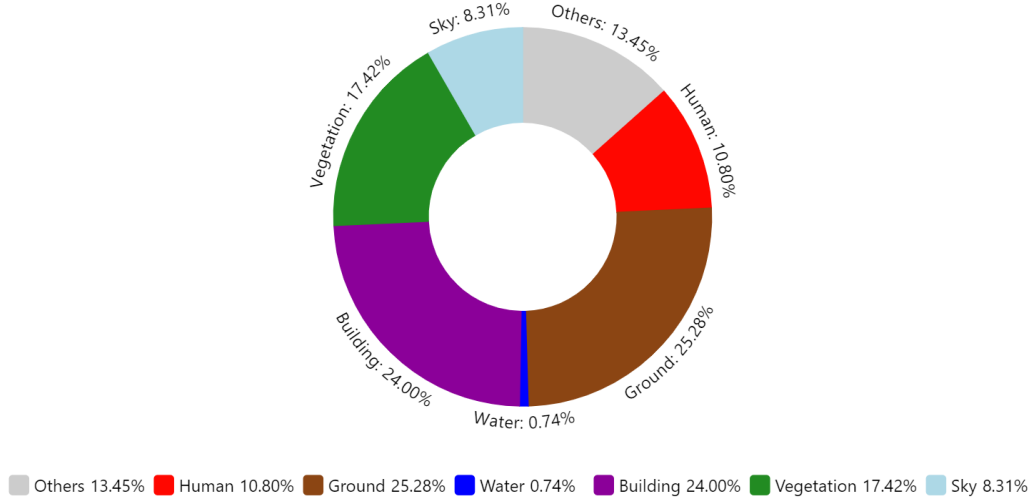

Figure 2. Pixel distribution of the seven categories in MaSS13K.

## A.2. Pixel Distribution of the Categories in MaSS13K

Fig. 2 illustrates the pixel distribution of the seven annotated categories in MaSS13K. Except for the “Water” category, the pixel distribution of the other categories is relatively balanced. The dataset primarily consists of outdoor street scenes and urban landscapes, resulting in the highest pixel proportions for “Ground” and “Building”. Additionally, 13.45% of the pixels in the dataset are classified as “Others”, which includes various objects such as traffic signs, billboards, and vehicles. Despite being grouped into the “Others” category, these objects are accurately labeled, ensuring the high quality of the dataset and its potential for further processing and development.

## B. More Details on Training and Evaluation Metrics

### B.1. Training Details

We implement MaSSFormer using mmsegmentation toolbox [3]. We use the AdamW [7] optimizer to train our model with a batch size of 16. The initial learning rate is set to 0.003 with a weight decay of 0.05, and the cosine decay schedule is applied during training. For data augmentation, we mainly follow the setup of Mask2Former [1], including random resizing, random cropping, and random flipping. The models are trained for 80k iterations on the MaSS13K dataset.

For the other evaluated methods on the MaSS13K dataset, we use their default settings on learning rate and data augmentation. The resolution during training and testing for all methods is kept consistent to ensure a fair comparison. The number of parameters and FLOPs for all methods are calculated using the mmsegmentation tools, except for PEM and MPFormer, which are calculated using Detectron2 tools.

### B.2. Details of Evaluation Metrics

In high-resolution semantic segmentation, there are numerous fine-grained regions of object details that are critical for the quality of the segmentation masks. However, the standard mask IoU metric is too coarse to differentiate these fine-grained regions, making it less effective in evaluating high-resolution semantic segmentation performance. To better evaluate and compare the methods of high-resolution semantic segmentation, we also use boundary-focused metrics, including Boundary IoU (BIOU) [2] and Boundary F-1 Score (BF1) [4], in the main paper.

**BIOU.** For the mask of the  $i$ -th category, the BIOU <sup>$i$</sup>  is defined as follows:

$$\text{BIOU}^i = \frac{(G_d^i \cap G^i) \cap (P_d^i \cap P^i)}{(G_d^i \cap G^i) \cup (P_d^i \cap P^i)}, \quad (1)$$

where  $P$  and  $G$  denote the predicted and ground-truth maps, respectively, and the subscript  $d$  denotes the mask obtained by dilating the boundary by  $d$  pixels. In our benchmark, we set  $d$  to 0.1% of the diagonal length, which is 5 pixels, to better measure the accuracy of details.

**BF1.** BF1 Score is a commonly used evaluation metric for edge detection and segmentation that combines precision and recall to assess the edge quality of a segmentation map. The BF1 score is calculated as follows:

$$\text{BF1} = 2 \times \frac{\text{Precision} \times \text{Recall}}{\text{Precision} + \text{Recall}}, \quad (2)$$

where  $\text{Precision} = \frac{\text{TP}}{\text{TP} + \text{FP}}$  and  $\text{Recall} = \frac{\text{TP}}{\text{TP} + \text{FN}}$ . In this case, if a point of predicted boundary matches a ground truth boundary point within a distance error tolerance, it is considered a true positive. In our evaluation, we set the distance error tolerance to 2. “TP + FP” can be represented by the total number of edge points in the ground truth map, and “TP + FN” can be represented by the total number of edge points in prediction map.

## C. More Experimental Results

### C.1. Ablation on Different Backbones

In Tab. 1, we compare the performance of Mask2Former and MaSSFormer using stronger backbones. We can observe that with stronger backbones, the IoU scores become higher due to the improved global semantic extraction capabilities. However, the BIoU and BF1 gaps between Mask2Former and our proposed MaSSFormer are enlarged, further validating that MaSSFormer can better process detail regions and produce higher-quality segmentation edges.

| Methods     | Backbone | MaSS-val      |               |                  | MaSS-test     |               |                  | Stat.  |       |
|-------------|----------|---------------|---------------|------------------|---------------|---------------|------------------|--------|-------|
|             |          | mIoU          | BIoU          | BF1              | mIoU          | BIoU          | BF1              | Para.  | FLOPS |
| Mask2Former | Swin-T   | 89.17         | 48.27         | 0.5529           | 89.47         | 47.97         | 0.5509           | 47.40M | 3148G |
| MaSSFormer  | Swin-T   | 89.49 (+0.32) | 49.68 (+1.41) | 0.5719 (+0.0190) | 89.40 (-0.07) | 49.50 (+1.53) | 0.5685 (+0.0176) | 40.92M | 1956G |
| Mask2Former | Swin-B   | 91.30         | 51.20         | 0.5912           | 91.10         | 50.83         | 0.5893           | 107M   | 6126G |
| MaSSFormer  | Swin-B   | 91.35 (+0.05) | 53.00 (+1.80) | 0.6102 (+0.0190) | 91.31 (+0.21) | 52.74 (+1.91) | 0.6076 (+0.0183) | 100M   | 4890G |

Table 1. Quantitative comparison with different backbones.

### C.2. Results of Each Category

In Tab. 2 and Tab. 3, we present detailed quantitative results for each category in **MaSS-val** and **MaSS-test**, respectively. From the two tables, it is evident that the ‘Others’ class has the lowest IoU scores. This is because the ‘Others’ class aggregates a variety of objects beyond the six categories, making it more challenging to identify and leading to lower overall IoU. In contrast, the ‘Human’ and ‘Sky’ categories are relatively distinct and well-defined, resulting in higher IoU scores. Additionally, we observe that MaSSFormer achieves the most significant improvement in BIoU for the ‘Vegetation’ category compared to other methods. This aligns with our visual observations, as trees in the dataset contain a large amount of boundaries and details.

### C.3. More Details and Results on Segmenting New Classes

**Details of the Pipeline.** We utilize the Grounded-SAM [8] as a semi-automatic labeling tool to obtain pseudo labels without human effort. Grounded-SAM employs the bounding boxes from Grounding-DINO [6] as the input to SAM [5] to generate masks for the corresponding objects. Grounding-DINO, as an open-vocabulary detection model, can take any text prompt and produce bounding boxes for objects of that category in the image. Therefore, for a new category ‘X’, we input ‘X’ as a text-prompt into Grounded-SAM, process all images in the dataset to obtain instance segmentation masks for that category, and then merge and convert these masks into semantic segmentation labels for the new category ‘X’. We combine the semantic labels of the new category with the existing seven categories’ labels for joint model training. To provide a quantitative evaluation of the mask quality for the new category, we manually annotate a set of images of that category from the test set to calculate the mIoU, BIoU, and BF1 scores.

**More Results.** In the main paper, we have validated the effectiveness of our method in segmenting a new class ‘Car’ on MaSS13K. In this supplementary file, we conduct experiments on another new class ‘Bicycle’. The results are shown in Tab. 4. For the convenience of readers, we also put the results of class ‘Car’ in the table. We can see that for both of the two new classes, the IoU, BIoU, and BF1 metrics show significant improvements over the baseline. Some visual examples

Table 2. Quantitative evaluation on MaSS-val for each category.

| Methods         | Others |       |       | Human |       |       | Building |       |       | Vegetation |       |       | Ground |       |       | Sky   |       |       | Water |       |       |
|-----------------|--------|-------|-------|-------|-------|-------|----------|-------|-------|------------|-------|-------|--------|-------|-------|-------|-------|-------|-------|-------|-------|
|                 | mIoU   | BIoU  | BF1   | mIoU  | BIoU  | BF1   | mIoU     | BIoU  | BF1   | mIoU       | BIoU  | BF1   | mIoU   | BIoU  | BF1   | mIoU  | BIoU  | BF1   | mIoU  | BIoU  | BF1   |
| STDC2           | 66.52  | 18.39 | .2041 | 95.77 | 45.06 | .5366 | 77.96    | 19.78 | .2467 | 87.88      | 22.84 | .2701 | 90.62  | 32.54 | .4311 | 89.96 | 34.21 | .3647 | 73.51 | 23.66 | .2582 |
| BiSeNetV2       | 53.26  | 13.31 | .1589 | 92.38 | 38.90 | .5087 | 69.93    | 15.27 | .2013 | 83.62      | 27.45 | .3013 | 85.16  | 26.84 | .3940 | 82.90 | 41.45 | .4637 | 35.83 | 11.40 | .1417 |
| SegNext         | 70.17  | 25.37 | .3050 | 97.58 | 59.61 | .7061 | 82.22    | 27.68 | .3440 | 89.30      | 36.58 | .4132 | 93.74  | 40.94 | .5392 | 92.40 | 48.89 | .5783 | 88.60 | 40.50 | .4462 |
| PIDNet-L        | 64.71  | 19.83 | .2258 | 96.16 | 44.74 | .4597 | 77.74    | 21.82 | .2620 | 86.64      | 29.74 | .3278 | 89.84  | 32.24 | .4324 | 89.64 | 41.85 | .4515 | 71.15 | 28.90 | .3144 |
| FeedFormer      | 65.90  | 23.34 | .2870 | 97.02 | 57.68 | .6986 | 79.46    | 26.97 | .3465 | 89.67      | 44.59 | .5006 | 92.66  | 38.93 | .5187 | 94.10 | 62.19 | .7321 | 91.42 | 40.73 | .4464 |
| SeaFormer       | 69.75  | 24.53 | .2918 | 97.10 | 57.88 | .7029 | 82.63    | 26.93 | .3349 | 88.41      | 34.61 | .3955 | 92.16  | 39.69 | .5211 | 93.59 | 48.56 | .5565 | 83.83 | 38.13 | .4279 |
| CGRSeg          | 59.32  | 21.83 | .2618 | 90.42 | 47.90 | .6129 | 74.05    | 23.42 | .2917 | 88.15      | 34.30 | .3843 | 87.47  | 34.53 | .4699 | 88.88 | 46.60 | .5486 | 80.80 | 32.78 | .4031 |
| DeepLabV3+      | 67.61  | 22.76 | .2947 | 96.30 | 56.36 | .7074 | 78.83    | 25.30 | .3359 | 89.35      | 41.46 | .4831 | 90.25  | 34.66 | .4935 | 94.09 | 60.35 | .6822 | 90.28 | 40.38 | .4518 |
| UperNet         | 62.60  | 20.15 | .2554 | 92.60 | 45.40 | .5772 | 77.32    | 23.63 | .2941 | 88.20      | 39.85 | .4479 | 88.79  | 33.03 | .4553 | 91.44 | 58.36 | .6253 | 73.46 | 31.39 | .3456 |
| OCRNet          | 61.11  | 18.34 | .2304 | 93.91 | 46.63 | .6051 | 75.17    | 20.19 | .2617 | 88.22      | 31.15 | .3577 | 89.35  | 31.17 | .4398 | 92.45 | 47.05 | .5077 | 87.78 | 34.61 | .3548 |
| MaskFormer      | 60.16  | 19.82 | .2680 | 94.55 | 51.09 | .6463 | 72.94    | 22.80 | .3043 | 87.83      | 43.98 | .4844 | 85.69  | 29.78 | .4303 | 93.96 | 62.15 | .7159 | 87.72 | 40.65 | .4194 |
| Mask2Former     | 72.45  | 31.23 | .3907 | 98.13 | 66.08 | .7755 | 82.95    | 32.86 | .4165 | 90.25      | 45.99 | .5170 | 93.23  | 44.72 | .5824 | 94.52 | 63.59 | .7417 | 86.42 | 47.35 | .5241 |
| MPPFormer       | 73.34  | 31.84 | .3913 | 98.49 | 67.49 | .7885 | 84.29    | 33.93 | .4258 | 89.93      | 46.90 | .5305 | 93.04  | 44.68 | .5772 | 93.59 | 64.29 | .7475 | 81.68 | 45.54 | .5139 |
| PEM             | 68.10  | 25.46 | .3198 | 97.50 | 60.32 | .7288 | 70.49    | 23.61 | .3232 | 89.75      | 44.25 | .4929 | 77.71  | 26.98 | .4225 | 93.31 | 61.66 | .7171 | 87.02 | 41.30 | .4480 |
| MaSSFormer-Lite | 67.62  | 26.02 | .3288 | 96.98 | 61.01 | .7352 | 79.65    | 30.01 | .3854 | 88.90      | 49.31 | .5374 | 90.59  | 38.90 | .5327 | 95.35 | 68.26 | .7587 | 90.65 | 43.97 | .4784 |
| MaSSFormer      | 71.27  | 30.84 | .3931 | 97.44 | 64.62 | .7783 | 82.74    | 33.74 | .4385 | 89.76      | 50.36 | .5799 | 93.40  | 44.13 | .5605 | 95.90 | 69.91 | .8108 | 92.32 | 49.18 | .5594 |

Table 3. Quantitative evaluation on MaSS-test for each category.

| Methods         | Others |       |       | Human |       |       | Building |       |       | Vegetation |       |       | Ground |       |       | Sky   |       |       | Water |       |       |
|-----------------|--------|-------|-------|-------|-------|-------|----------|-------|-------|------------|-------|-------|--------|-------|-------|-------|-------|-------|-------|-------|-------|
|                 | mIoU   | BIoU  | mIoU  | BF1   | BIoU  | mIoU  | BF1      | BIoU  | mIoU  | BF1        | BIoU  | mIoU  | BF1    | BIoU  | mIoU  | BF1   | BIoU  | mIoU  | BF1   | BIoU  | BF1   |
| STDC2           | 66.75  | 17.88 | .2008 | 94.98 | 43.71 | .5246 | 78.97    | 19.69 | .2492 | 87.72      | 22.36 | .2680 | 90.35  | 31.82 | .4302 | 91.20 | 34.27 | .3712 | 76.37 | 24.29 | .2622 |
| BiSeNetV2       | 52.63  | 12.84 | .1600 | 90.53 | 37.35 | .4967 | 70.37    | 15.24 | .2010 | 83.31      | 26.91 | .2979 | 84.90  | 26.45 | .3934 | 86.50 | 41.27 | .4625 | 42.23 | 11.27 | .1500 |
| SegNext         | 69.80  | 24.63 | .3031 | 97.41 | 58.45 | .6935 | 82.40    | 27.45 | .3472 | 89.41      | 36.24 | .4076 | 93.49  | 39.78 | .5316 | 93.50 | 49.49 | .5775 | 90.76 | 40.12 | .4490 |
| PIDNet-L        | 64.63  | 19.65 | .2269 | 95.47 | 43.50 | .4505 | 78.24    | 22.13 | .2668 | 87.07      | 29.38 | .3210 | 89.69  | 31.77 | .4304 | 89.95 | 42.08 | .4586 | 67.31 | 26.38 | .3191 |
| FeedFormer      | 65.67  | 22.47 | .2823 | 96.29 | 55.91 | .6824 | 79.82    | 26.70 | .3464 | 89.55      | 44.06 | .4898 | 92.34  | 37.80 | .5138 | 94.29 | 62.28 | .7281 | 88.02 | 38.31 | .4457 |
| SeaFormer       | 69.30  | 24.23 | .2927 | 96.23 | 56.49 | .6923 | 82.68    | 27.04 | .3373 | 88.66      | 34.30 | .3883 | 92.13  | 38.77 | .5172 | 93.61 | 48.96 | .5556 | 88.96 | 38.23 | .4354 |
| CGRSeg          | 59.17  | 21.09 | .2596 | 90.65 | 46.80 | .6038 | 73.96    | 23.37 | .2952 | 87.97      | 33.82 | .3778 | 87.68  | 33.78 | .4686 | 90.64 | 46.92 | .5426 | 80.09 | 31.92 | .3942 |
| DeepLabV3+      | 67.32  | 22.46 | .2930 | 95.65 | 54.11 | .6906 | 79.25    | 25.66 | .3363 | 89.35      | 41.53 | .4763 | 89.76  | 33.95 | .4859 | 93.37 | 60.16 | .6816 | 81.25 | 32.65 | .4224 |
| UperNet         | 61.97  | 19.78 | .2515 | 90.70 | 43.30 | .5601 | 77.74    | 24.19 | .3000 | 88.20      | 40.29 | .4429 | 88.20  | 32.56 | .4500 | 92.19 | 59.08 | .6318 | 74.87 | 30.06 | .3617 |
| OCRNet          | 60.60  | 17.57 | .2222 | 92.41 | 43.44 | .5875 | 75.76    | 20.08 | .2580 | 87.74      | 30.36 | .3437 | 88.48  | 29.83 | .4306 | 92.65 | 46.95 | .5070 | 83.56 | 31.10 | .3501 |
| MaskFormer      | 61.28  | 19.65 | .2679 | 94.48 | 50.26 | .6430 | 74.64    | 22.99 | .3059 | 88.24      | 44.14 | .4818 | 85.61  | 29.04 | .4241 | 94.25 | 62.80 | .7160 | 84.06 | 36.45 | .4182 |
| Mask2Former     | 70.67  | 29.60 | .3708 | 97.69 | 65.02 | .7656 | 80.83    | 31.94 | .4033 | 90.25      | 44.37 | .4985 | 91.66  | 42.60 | .5608 | 94.88 | 64.13 | .7241 | 90.00 | 45.27 | .5233 |
| MPPFormer       | 72.38  | 31.23 | .3896 | 98.06 | 66.13 | .7784 | 83.91    | 33.67 | .4271 | 90.17      | 46.70 | .5228 | 92.58  | 43.68 | .5718 | 93.57 | 64.81 | .7451 | 79.63 | 44.02 | .5124 |
| PEM             | 67.70  | 25.04 | .3210 | 97.46 | 59.97 | .7205 | 72.14    | 24.02 | .3287 | 89.12      | 44.01 | .4854 | 78.75  | 26.12 | .4146 | 91.86 | 61.25 | .7094 | 86.69 | 39.51 | .4593 |
| MaSSFormer-Lite | 66.80  | 25.11 | .3260 | 96.39 | 59.19 | .7216 | 79.60    | 29.55 | .3844 | 88.77      | 46.75 | .5280 | 90.87  | 37.69 | .5170 | 94.77 | 64.54 | .7548 | 85.71 | 40.08 | .4707 |
| MaSSFormer      | 70.07  | 29.70 | .3860 | 97.23 | 64.02 | .7665 | 81.65    | 33.40 | .4387 | 90.03      | 51.91 | .5772 | 91.51  | 41.56 | .5557 | 95.60 | 70.30 | .8043 | 90.18 | 47.82 | .5611 |

Table 4. Quantitative evaluation on novel classes **Bicycle** and **Car**.

| Settings                                        | <b>Bicycle</b> |       |        | <b>Car</b> |       |        |
|-------------------------------------------------|----------------|-------|--------|------------|-------|--------|
|                                                 | mIoU           | BIoU  | BF1    | mIoU       | BIoU  | BF1    |
| Pseudo label generated by Grounded-SAM          | 49.40          | 23.82 | 0.2800 | 94.18      | 20.44 | 0.2522 |
| Prediction generated by our joint-trained model | 74.57          | 40.17 | 0.4609 | 95.21      | 35.68 | 0.3643 |

of the segmentation results of ‘Bicycle’ are presented in Fig. 3. We can see that due to the relatively small size of bicycle targets, the incorrect segmentation of the wheels can severely impact the IoU scores, as shown in the 2nd row of Fig. 3. In addition, the failure of Grounded-SAM to detect small targets can further reduce the IoU, as illustrated in the 1st row of Fig. 3. Our method, designed for high-resolution images, can effectively capture fine structural details and boundaries, resulting in higher IoU and BF1 scores. Furthermore, under the joint supervision of other precise categories, our method can accurately distinguish foreground from background at the wheel areas, resulting in precise segmentation of the target objects.



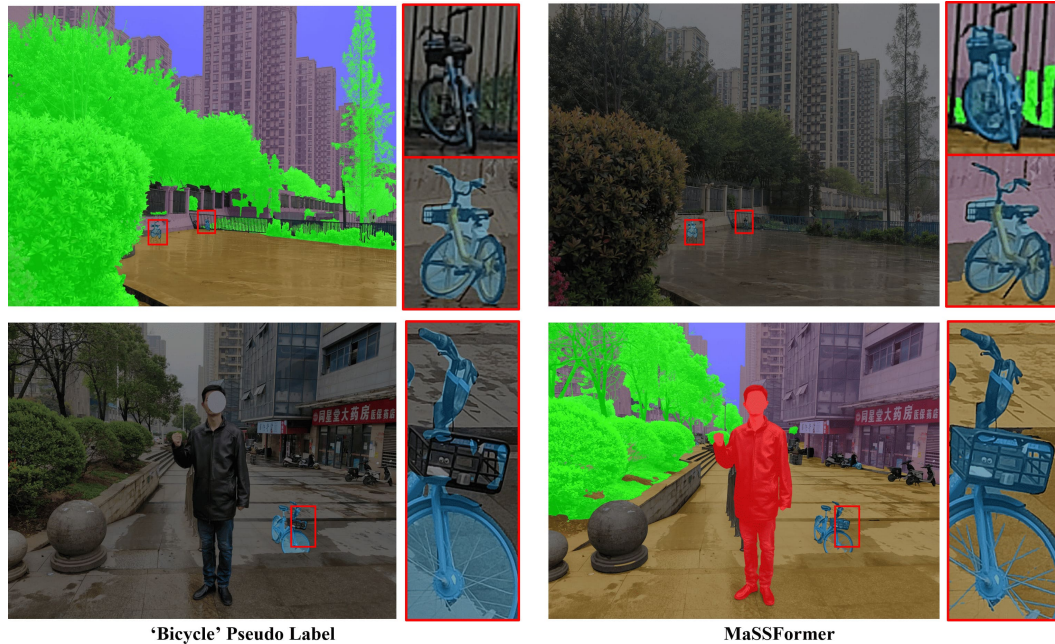

Figure 3. Visual results on the segmentation of ‘Bicycle’ class. Left: Pseudo-labels generated by Grounded-SAM. Right: Predictions by MaSSFormer.

#### C.4. More Qualitative Comparisons

We present more qualitative comparisons between our MaSSFormer and other representative methods in Fig. 4. It can be seen that MaSSFormer demonstrates superior performance in segmenting fine-grained regions, such as the thin lines in the 1st image. It maintains accurate segmentation even for small objects in the distance (the 3rd image). For fine structures such as hair, the competing methods often fail to achieve fine-level segmentation and tend to predict the surrounding areas as hair (the 2nd and 4th images). In contrast, MaSSFormer effectively distinguishes hair and other detailed elements from the background, ensuring high-quality segmentation.

#### D. Limitations

First, while MaSS13K provides 13K finely annotated images, it can be further expanded in the number of samples, scenes, and categories. Second, although MaSSFormer has achieved a relatively good balance between accuracy and efficiency, its computational cost and memory usage are still high, especially for mobile devices. New lightweight networks are expected for efficient yet accurate high-resolution semantic segmentation.

#### References

- [1] Bowen Cheng, Anwesa Choudhuri, Ishan Misra, Alexander Kirillov, Rohit Girdhar, and Alexander G Schwing. Mask2former for video instance segmentation. *arXiv preprint arXiv:2112.10764*, 2021. 2
- [2] Bowen Cheng, Ross Girshick, Piotr Dollár, Alexander C Berg, and Alexander Kirillov. Boundary iou: Improving object-centric image segmentation evaluation. In *Proceedings of the IEEE/CVF Conference on Computer Vision and Pattern Recognition*, 2021. 2
- [3] MMSegmentation Contributors. MMSegmentation: Openmmlab semantic segmentation toolbox and benchmark. <https://github.com/open-mmlab/mms Segmentation>, 2020. 2
- [4] Gabriela Csurka, Diane Larlus, Florent Perronnin, and France Meylan. What is a good evaluation measure for semantic segmentation?. In *Bmvc*, pages 10–5244. Bristol, 2013. 2
- [5] Alexander Kirillov, Eric Mintun, Nikhila Ravi, Hanzi Mao, Chloe Rolland, Laura Gustafson, Tete Xiao, Spencer Whitehead, Alexander C Berg, Wan-Yen Lo, et al. Segment anything. In *Proceedings of the IEEE/CVF International Conference on Computer Vision*, pages 4015–4026, 2023. 3
- [6] Shilong Liu, Zhaoyang Zeng, Tianhe Ren, Feng Li, Hao Zhang, Jie Yang, Chunyuan Li, Jianwei Yang, Hang Su, Jun Zhu, et al. Grounding dino: Marrying dino with grounded pre-training for open-set object detection. *arXiv preprint arXiv:2303.05499*, 2023. 3

- [7] I Loshchilov. Decoupled weight decay regularization. *arXiv preprint arXiv:1711.05101*, 2017. [2](#)
- [8] Tianhe Ren, Shilong Liu, Ailing Zeng, Jing Lin, Kunchang Li, He Cao, Jiayu Chen, Xinyu Huang, Yukang Chen, Feng Yan, Zhaoyang Zeng, Hao Zhang, Feng Li, Jie Yang, Hongyang Li, Qing Jiang, and Lei Zhang. Grounded sam: Assembling open-world models for diverse visual tasks, 2024. [3](#)



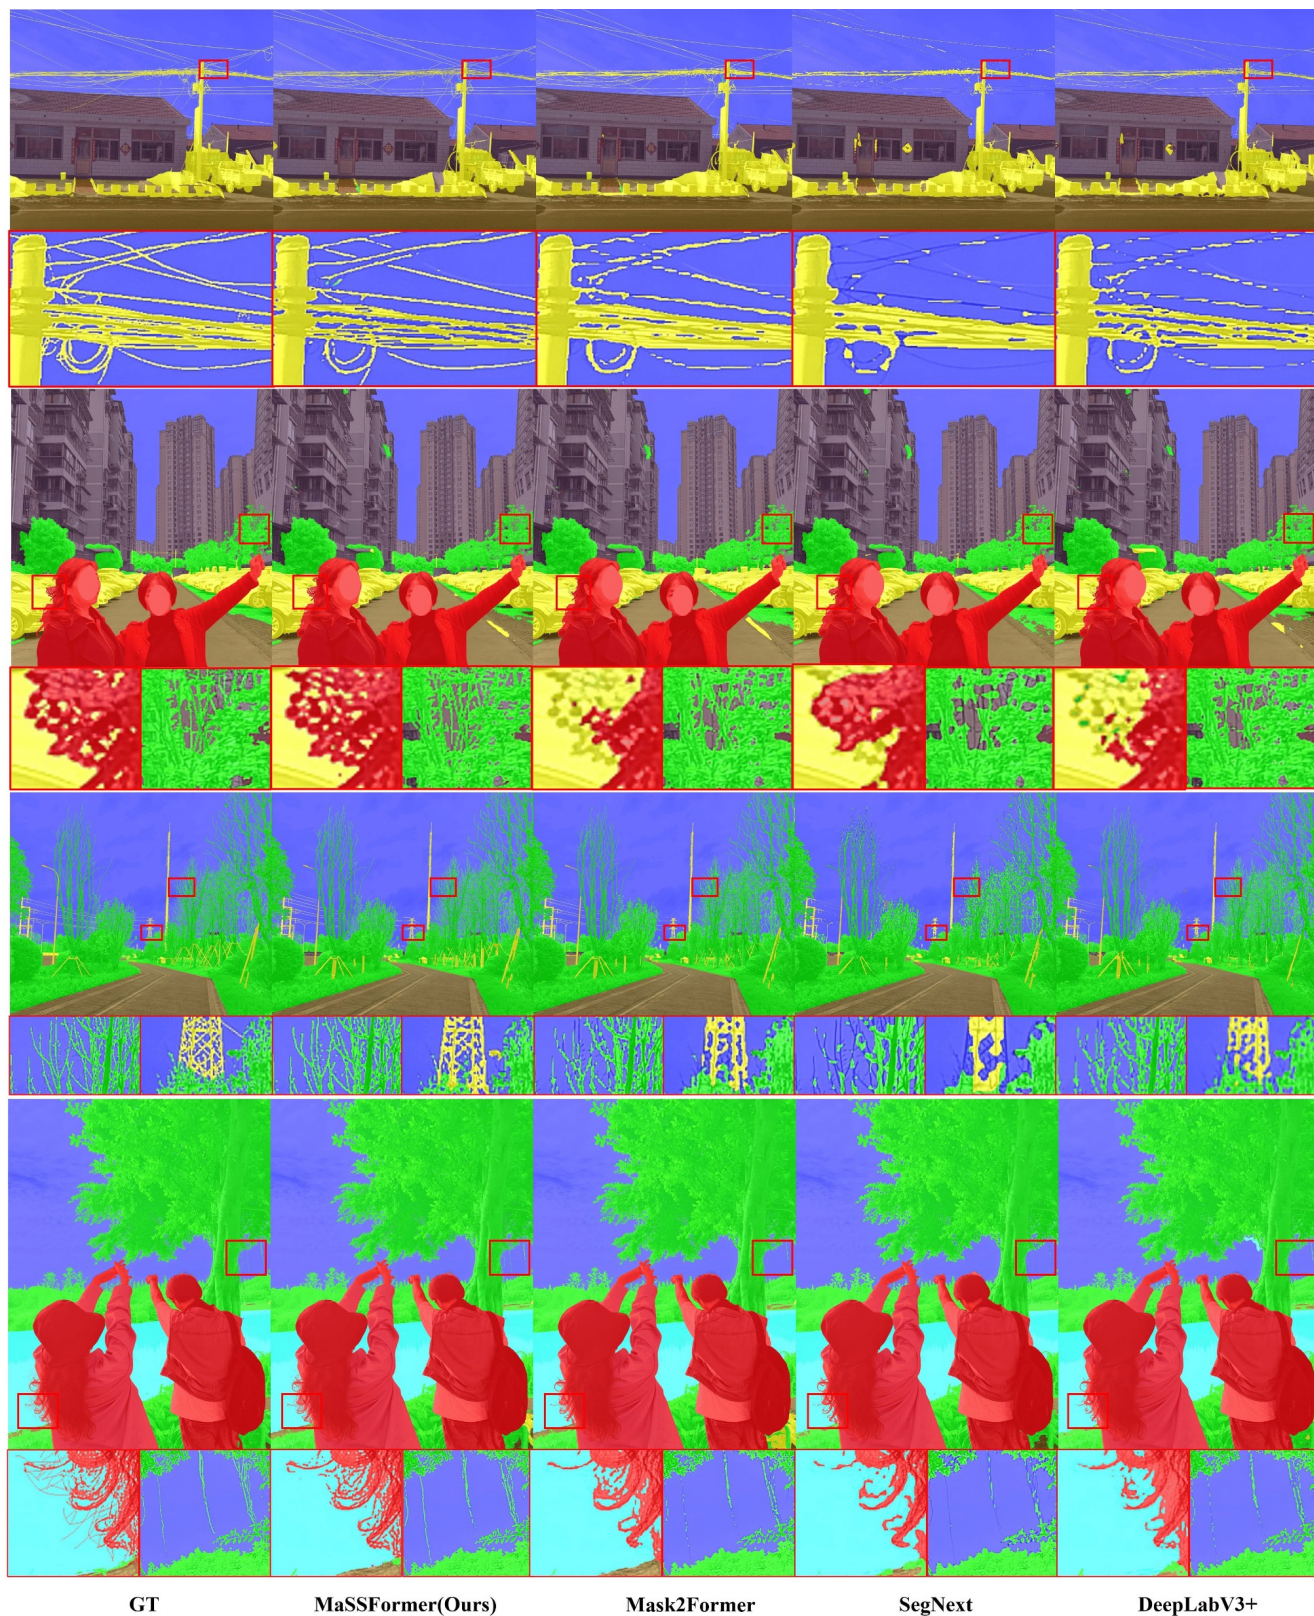

Figure 4. More qualitative comparisons between MaSSFormer and other methods. Please zoom-in for a better view.
